# Supplementary material
Source: publisher figshare collection journal article supplement (https://rs.figshare.com/ndownloader/files/23098262)
Supplement: Supplementary file 1 [file 23098262]

## Sheet: Sheet1
Table S6 Migration rates between sympatric stickleback species
Rank order	m1->2	m2->1	Mean	Location	System	Reference
1	0.00035	4.8e-05	0.000199	Comida	Lake-stream	Stuart et al. 2017
2	0.00023	6e-05	0.000145	Moore	Lake-stream	Stuart et al. 2017
3	0.00018	6.8e-05	0.000124	Northy	Lake-stream	Stuart et al. 2017
4	0.00015	8.9e-05	0.0001195	Village Bay	Lake-stream	Stuart et al. 2017
5	0.00018	4.5e-05	0.0001125	Muchalat	Lake-stream	Stuart et al. 2017
6	0.00013	9.2e-05	0.000111	Pachena	Lake-stream	Stuart et al. 2017
7	4.2e-05	0.00012	8.1e-05	Boot	Lake-stream	Stuart et al. 2017
8	4.5e-05	0.00011	7.75e-05	Thiemer	Lake-stream	Stuart et al. 2017
9	0.00012	2.6e-05	7.3e-05	Misty	Lake-stream	Stuart et al. 2017
10	7.2e-05	6.7e-05	6.95e-05	Kennedy	Lake-stream	Stuart et al. 2017
11	7.2e-05	5.2e-05	6.2e-05	Roberts	Lake-stream	Stuart et al. 2017
12	3.6e-07	0.00012	6.018e-05	Frederick	Lake-stream	Stuart et al. 2017
13	4e-05	7.8e-05	5.9e-05	Beaver	Lake-stream	Stuart et al. 2017
14	8e-05	2.4e-05	5.2e-05	Swan	Lake-stream	Stuart et al. 2017
15	6.8e-05	3.1e-05	4.95e-05	Pye	Lake-stream	Stuart et al. 2017
16	4.8e-05	3.8e-05	4.3e-05	Joe	Lake-stream	Stuart et al. 2017
17	1.3e-06	1.05e-06	1.175e-06	Akkeshi	Japanese Sea-Pacific Ocean	Ravinet et al. 2018
18	5.03e-07	1.88e-07	3.455e-07	Shiomi River	P. sinensis-P. pungitius	This study
References
Ravinet M. Yoshida K. Shigenobu S. Toyoda A. Fujiyama A. Kitano J. 2018 The genomic landscape at a late stage of stickleback speciation: High genomic divergence interspersed by small localized regions of introgression. PLoS Genet. 14, e1007358.
Stuart YE. et al. 2017 Contrasting effects of environment and genetics generate a continuum of parallel evolution. Nature Ecol. Evol. 1, 0158.
